# Supplementary material for: Source and Migration of Fluids in a Meso-Tethyan Subduction Zone: Fluid Inclusion Study of Syn-Mélange Veins from the Mugagangri Accretionary Complex
Source: MDPI journal article supplement (doi:10.3390/min13091196), 2023-09-12
Supplement: s1 [file s1]

Table S1: Results of fluid inclusion analysis

| Sample                         | Host mineral | Type | Diameter | Gas-liquid | Th    | Tm   | Salinity    | Density              |
|--------------------------------|--------------|------|----------|------------|-------|------|-------------|----------------------|
|                                |              |      | (μm)     | ratio(%)   | (°C)  | (°C) | (NaCl wt.%) | (g/cm <sup>3</sup> ) |
| GZ-411-S1 (n = 25; this study) |              |      |          |            |       |      |             |                      |
| S1-1                           | Quartz       | I    | 7.3      | 5          | 164.2 | -3.1 | 5.11        | 0.94                 |
| S1-2                           | Quartz       | I    | 5.2      | 5          | 172.4 | -0.8 | 1.40        | 0.91                 |
| S1-3                           | Quartz       | I    | 6.1      | 10         | 180.2 | -0.5 | 0.88        | 0.90                 |
| S1-4                           | Quartz       | I    | 5.4      | 10         | 152.4 | -1.6 | 2.74        | 0.94                 |
| S1-5                           | Quartz       | I    | 9.8      | 5          | 165.3 | -1.7 | 2.90        | 0.93                 |
| S1-6                           | Quartz       | I    | 10.2     | 30         | 192.4 | -0.3 | 0.53        | 0.88                 |
| S1-7                           | Quartz       | I    | 5.5      | 10         | 172.1 | -0.7 | 1.22        | 0.91                 |
| S1-8                           | Quartz       | I    | 7.2      | 5          | 172.8 | -1.4 | 2.41        | 0.92                 |
| S1-9                           | Quartz       | I    | 6.5      | 5          | 156.3 | -1.6 | 2.74        | 0.94                 |
| S1-10                          | Quartz       | I    | 9.5      | 5          | 166.4 | -0.2 | 0.35        | 0.91                 |
| S1-11                          | Quartz       | I    | 6.4      | 10         | 163.5 | -0.7 | 1.22        | 0.92                 |
| S1-12                          | Quartz       | I    | 8.5      | 5          | 181.4 | -2.9 | 4.80        | 0.92                 |
| S1-13                          | Quartz       | I    | 5.5      | 10         | 159.5 | -1.7 | 2.90        | 0.93                 |
| S1-14                          | Quartz       | I    | 12.3     | 5          | 165.8 | -0.5 | 0.88        | 0.91                 |
| S1-15                          | Quartz       | I    | 5.6      | 5          | 190.2 | -2.6 | 4.34        | 0.91                 |
| S1-16                          | Quartz       | I    | 7.4      | 5          | 187.1 | -3.5 | 5.71        | 0.92                 |
| S1-17                          | Quartz       | I    | 6.5      | 10         | 159.8 | -0.2 | 0.35        | 0.92                 |
| S1-18                          | Quartz       | I    | 6.7      | 10         | 174.3 | -0.6 | 1.05        | 0.91                 |
| S1-19                          | Quartz       | I    | 6.5      | 20         | 142.8 | -0.8 | 1.40        | 0.94                 |
| S1-20                          | Quartz       | I    | 7.1      | 5          | 146.7 | -1.4 | 2.41        | 0.94                 |
| S1-21                          | Quartz       | I    | 7.5      | 5          | 166.4 | -1.8 | 3.06        | 0.93                 |
| S1-22                          | Quartz       | I    | 5.7      | 5          | 136.9 | -0.8 | 1.40        | 0.95                 |

|                                |        |   |      |    |       |      |      |      |
|--------------------------------|--------|---|------|----|-------|------|------|------|
| S1-23                          | Quartz | I | 8.1  | 20 | 124.9 | -0.9 | 1.57 | 0.96 |
| S1-24                          | Quartz | I | 6.7  | 10 | 158.6 | -3.5 | 5.71 | 0.95 |
| S1-25                          | Quartz | I | 6.3  | 10 | 142.8 | -5.8 | 8.95 | 0.99 |
| GZ-411-S2 (n = 30; this study) |        |   |      |    |       |      |      |      |
| S2-1                           | Quartz | I | 8.1  | 15 | 187.2 | -1.2 | 2.07 | 0.90 |
| S2-2                           | Quartz | I | 7.5  | 15 | 165.3 | -1.2 | 2.07 | 0.92 |
| S2-3                           | Quartz | I | 8.6  | 15 | 143.8 | -0.5 | 0.88 | 0.94 |
| S2-4                           | Quartz | I | 5.5  | 15 | 184.2 | -1.5 | 2.57 | 0.90 |
| S2-5                           | Quartz | I | 7.2  | 20 | 216.3 | -0.6 | 1.05 | 0.85 |
| S2-6                           | Quartz | I | 8.1  | 5  | 175.2 | -2.5 | 4.18 | 0.93 |
| S2-7                           | Quartz | I | 6.8  | 5  | 210.3 | -1.7 | 2.90 | 0.87 |
| S2-8                           | Quartz | I | 9.4  | 15 | 167.5 | -1.9 | 3.23 | 0.93 |
| S2-9                           | Quartz | I | 10.3 | 15 | 169.8 | -2.2 | 3.71 | 0.93 |
| S2-10                          | Quartz | I | 6.3  | 30 | 157.6 | -1.8 | 3.06 | 0.94 |
| S2-11                          | Quartz | I | 7.4  | 40 | 178.5 | -2.5 | 4.18 | 0.92 |
| S2-12                          | Quartz | I | 6.9  | 20 | 174.2 | -0.4 | 0.70 | 0.90 |
| S2-13                          | Quartz | I | 11.5 | 15 | 179.3 | -0.8 | 1.40 | 0.90 |
| S2-14                          | Quartz | I | 6.5  | 10 | 184.2 | -0.6 | 1.05 | 0.89 |
| S2-15                          | Quartz | I | 5.5  | 10 | 208.3 | -1.9 | 3.23 | 0.88 |
| S2-16                          | Quartz | I | 7.4  | 5  | 169.5 | -1.5 | 2.57 | 0.92 |
| S2-17                          | Quartz | I | 12.7 | 10 | 173.2 | -1.6 | 2.74 | 0.92 |
| S2-18                          | Quartz | I | 6.8  | 20 | 184.2 | -1.8 | 3.06 | 0.91 |
| S2-19                          | Quartz | I | 9.4  | 20 | 152.3 | -0.9 | 1.57 | 0.93 |
| S2-20                          | Quartz | I | 8.8  | 30 | 197.5 | -2.7 | 4.49 | 0.90 |
| S2-21                          | Quartz | I | 7.9  | 5  | 185.6 | -3.5 | 5.71 | 0.92 |
| S2-22                          | Quartz | I | 5.9  | 5  | 175.3 | -0.7 | 1.22 | 0.91 |
| S2-23                          | Quartz | I | 6.5  | 10 | 179.8 | -0.6 | 1.05 | 0.90 |
| S2-24                          | Quartz | I | 7.3  | 10 | 192.6 | -1.8 | 3.06 | 0.90 |
| S2-25                          | Quartz | I | 8.4  | 20 | 164.5 | -1.3 | 2.24 | 0.92 |

|                                |        |   |      |    |       |      |      |      |
|--------------------------------|--------|---|------|----|-------|------|------|------|
| S2-26                          | Quartz | I | 8.8  | 10 | 163.9 | -1.6 | 2.74 | 0.93 |
| S2-27                          | Quartz | I | 7.2  | 20 | 187.4 | -1.7 | 2.90 | 0.90 |
| S2-28                          | Quartz | I | 6.4  | 15 | 156.8 | -1.8 | 3.06 | 0.94 |
| S2-29                          | Quartz | I | 9.2  | 10 | 177.2 | -2.4 | 4.03 | 0.92 |
| S2-30                          | Quartz | I | 7.8  | 30 | 184.1 | -5.8 | 8.95 | 0.95 |
| GZ-411-S3 (n = 33; this study) |        |   |      |    |       |      |      |      |
| S3-1                           | Quartz | I | 8.6  | 10 | 175.2 | -1.5 | 2.57 | 0.91 |
| S3-2                           | Quartz | I | 10.2 | 5  | 154.2 | -5.8 | 8.95 | 0.98 |
| S3-3                           | Quartz | I | 7.5  | 5  | 136.8 | -0.5 | 0.88 | 0.94 |
| S3-4                           | Quartz | I | 6.2  | 10 | 146.8 | -0.7 | 1.22 | 0.94 |
| S3-5                           | Quartz | I | 8.4  | 10 | 168.3 | -2.4 | 4.03 | 0.93 |
| S3-6                           | Quartz | I | 5.5  | 10 | 154.2 | -0.8 | 1.40 | 0.93 |
| S3-7                           | Quartz | I | 5.6  | 5  | 156.7 | -1.4 | 2.41 | 0.93 |
| S3-8                           | Quartz | I | 8.2  | 10 | 137.8 | -0.2 | 0.35 | 0.94 |
| S3-9                           | Quartz | I | 7.4  | 10 | 139.5 | -0.7 | 1.22 | 0.94 |
| S3-10                          | Quartz | I | 6.8  | 20 | 172.5 | -2.6 | 4.34 | 0.93 |
| S3-11                          | Quartz | I | 7.4  | 10 | 165.4 | -1.9 | 3.23 | 0.93 |
| S3-12                          | Quartz | I | 5.9  | 10 | 155.9 | -6.4 | 9.73 | 0.98 |
| S3-13                          | Quartz | I | 10.2 | 5  | 126.9 | -2.4 | 4.03 | 0.97 |
| S3-14                          | Quartz | I | 9.5  | 5  | 171.2 | -0.7 | 1.22 | 0.91 |
| S3-15                          | Quartz | I | 6.7  | 5  | 173.5 | -1.5 | 2.57 | 0.92 |
| S3-16                          | Quartz | I | 8.4  | 10 | 164.2 | -1.7 | 2.90 | 0.93 |
| S3-17                          | Quartz | I | 7.5  | 10 | 179.2 | -1.5 | 2.57 | 0.91 |
| S3-18                          | Quartz | I | 10.6 | 5  | 126.3 | -0.4 | 0.70 | 0.95 |
| S3-19                          | Quartz | I | 8.2  | 5  | 143.5 | -0.8 | 1.40 | 0.94 |
| S3-20                          | Quartz | I | 6.2  | 10 | 165.9 | -0.6 | 1.05 | 0.92 |
| S3-21                          | Quartz | I | 7.4  | 5  | 122.7 | -1.5 | 2.57 | 0.96 |
| S3-22                          | Quartz | I | 9.2  | 10 | 146.2 | -5.7 | 8.81 | 0.98 |
| S3-23                          | Quartz | I | 7.4  | 5  | 144.3 | -6.1 | 9.34 | 0.99 |

|                                |        |   |      |    |       |      |       |      |
|--------------------------------|--------|---|------|----|-------|------|-------|------|
| S3-24                          | Quartz | I | 12.7 | 10 | 181.6 | -2.7 | 4.49  | 0.92 |
| S3-25                          | Quartz | I | 6.3  | 5  | 131.2 | -1.9 | 3.23  | 0.96 |
| S3-26                          | Quartz | I | 6.8  | 10 | 139.6 | -1.5 | 2.57  | 0.95 |
| S3-27                          | Quartz | I | 7.3  | 20 | 142.8 | -0.2 | 0.35  | 0.93 |
| S3-28                          | Quartz | I | 5.9  | 15 | 142.6 | -0.3 | 0.53  | 0.94 |
| S3-29                          | Quartz | I | 6.7  | 20 | 187.2 | -0.7 | 1.22  | 0.89 |
| S3-30                          | Quartz | I | 8.4  | 5  | 123.4 | -8.7 | 12.51 | 1.03 |
| S3-31                          | Quartz | I | 7.6  | 5  | 152.7 | -6.4 | 9.73  | 0.99 |
| S3-32                          | Quartz | I | 9.5  | 10 | 146.2 | -0.8 | 1.40  | 0.94 |
| S3-33                          | Quartz | I | 6.6  | 5  | 137.5 | -0.7 | 1.22  | 0.94 |
| GZ-411-S4 (n = 29; this study) |        |   |      |    |       |      |       |      |
| S4-1                           | Quartz | I | 6.4  | 10 | 142.5 | -2.5 | 4.18  | 0.96 |
| S4-2                           | Quartz | I | 8.1  | 10 | 168.7 | -2.6 | 4.34  | 0.93 |
| S4-3                           | Quartz | I | 5.5  | 10 | 156.8 | -3.3 | 5.41  | 0.95 |
| S4-4                           | Quartz | I | 5.8  | 5  | 175.2 | -1.5 | 2.57  | 0.91 |
| S4-5                           | Quartz | I | 5.5  | 5  | 174.2 | -6.5 | 9.86  | 0.97 |
| S4-6                           | Quartz | I | 7.1  | 10 | 176.8 | -7.1 | 10.61 | 0.97 |
| S4-7                           | Quartz | I | 5.9  | 5  | 198.5 | -0.8 | 1.40  | 0.88 |
| S4-8                           | Quartz | I | 6.2  | 5  | 210.3 | -2.6 | 4.34  | 0.89 |
| S4-9                           | Quartz | I | 8.4  | 5  | 165.9 | -0.5 | 0.88  | 0.91 |
| S4-10                          | Quartz | I | 7.2  | 20 | 175.2 | -3.4 | 5.56  | 0.93 |
| S4-11                          | Quartz | I | 5.9  | 20 | 220.3 | -2.8 | 4.65  | 0.88 |
| S4-12                          | Quartz | I | 6.4  | 20 | 167.9 | -4.4 | 7.02  | 0.95 |
| S4-13                          | Quartz | I | 7.2  | 10 | 182.6 | -0.7 | 1.22  | 0.90 |
| S4-14                          | Quartz | I | 6.2  | 5  | 187.5 | -2.8 | 4.65  | 0.92 |
| S4-15                          | Quartz | I | 7.5  | 5  | 194.7 | -0.8 | 1.40  | 0.88 |
| S4-16                          | Quartz | I | 6.3  | 10 | 172.6 | -2.9 | 4.80  | 0.93 |
| S4-17                          | Quartz | I | 8.4  | 5  | 179.8 | -3.4 | 5.56  | 0.93 |
| S4-18                          | Quartz | I | 6.5  | 10 | 168.2 | -2.5 | 4.18  | 0.93 |

|                                |        |   |      |    |       |      |      |      |
|--------------------------------|--------|---|------|----|-------|------|------|------|
| S4-19                          | Quartz | I | 5.7  | 10 | 156.2 | -1.9 | 3.23 | 0.94 |
| S4-20                          | Quartz | I | 5.6  | 5  | 155.7 | -1.8 | 3.06 | 0.94 |
| S4-21                          | Quartz | I | 5.8  | 5  | 178.2 | -2.8 | 4.65 | 0.93 |
| S4-22                          | Quartz | I | 5.5  | 20 | 187.2 | -0.7 | 1.22 | 0.89 |
| S4-23                          | Quartz | I | 7.2  | 15 | 163.2 | -0.5 | 0.88 | 0.92 |
| S4-24                          | Quartz | I | 7.1  | 10 | 198.7 | -1.2 | 2.07 | 0.88 |
| S4-25                          | Quartz | I | 6.8  | 5  | 182.3 | -1.2 | 2.07 | 0.90 |
| S4-26                          | Quartz | I | 6.3  | 5  | 208.5 | -6.1 | 9.34 | 0.93 |
| S4-27                          | Quartz | I | 7.1  | 10 | 175.2 | -1.9 | 3.23 | 0.92 |
| S4-28                          | Quartz | I | 10.5 | 5  | 184.2 | -2.2 | 3.71 | 0.91 |
| S4-29                          | Quartz | I | 5.8  | 5  | 156.4 | -0.8 | 1.40 | 0.93 |
| GZ-411-S5 (n = 30; this study) |        |   |      |    |       |      |      |      |
| S5-1                           | Quartz | I | 7.2  | 10 | 187.4 | -2.2 | 3.71 | 0.91 |
| S5-2                           | Quartz | I | 5.5  | 10 | 177.2 | -2.5 | 4.18 | 0.92 |
| S5-3                           | Quartz | I | 6.5  | 10 | 165.3 | -2.3 | 3.87 | 0.93 |
| S5-4                           | Quartz | I | 5.7  | 15 | 142.9 | -5.5 | 8.55 | 0.99 |
| S5-5                           | Quartz | I | 6.7  | 15 | 197.5 | -1.2 | 2.07 | 0.89 |
| S5-6                           | Quartz | I | 6.6  | 20 | 172.3 | -1.6 | 2.74 | 0.92 |
| S5-7                           | Quartz | I | 7.1  | 5  | 156.2 | -2.1 | 3.55 | 0.94 |
| S5-8                           | Quartz | I | 5.5  | 10 | 187.5 | -6.4 | 9.73 | 0.95 |
| S5-9                           | Quartz | I | 5.8  | 15 | 177.2 | -0.5 | 0.88 | 0.90 |
| S5-10                          | Quartz | I | 5.5  | 15 | 174.6 | -0.9 | 1.57 | 0.91 |
| S5-11                          | Quartz | I | 10.7 | 15 | 168.2 | -3.2 | 5.26 | 0.94 |
| S5-12                          | Quartz | I | 6.1  | 20 | 175.2 | -2.2 | 3.71 | 0.92 |
| S5-13                          | Quartz | I | 5.4  | 20 | 168.2 | -3.2 | 5.26 | 0.94 |
| S5-14                          | Quartz | I | 8.7  | 20 | 178.5 | -2.4 | 4.03 | 0.92 |
| S5-15                          | Quartz | I | 6.4  | 15 | 176.2 | -2.1 | 3.55 | 0.92 |
| S5-16                          | Quartz | I | 6.2  | 15 | 142.6 | -2.4 | 4.03 | 0.96 |
| S5-17                          | Quartz | I | 6.5  | 30 | 186.3 | -1.8 | 3.06 | 0.91 |

|                                |        |   |      |    |       |      |      |      |
|--------------------------------|--------|---|------|----|-------|------|------|------|
| S5-18                          | Quartz | I | 6.5  | 30 | 197.5 | -2.5 | 4.18 | 0.90 |
| S5-19                          | Quartz | I | 5.5  | 15 | 175.2 | -1.7 | 2.90 | 0.92 |
| S5-20                          | Quartz | I | 8.4  | 10 | 177.6 | -0.8 | 1.40 | 0.90 |
| S5-21                          | Quartz | I | 8.2  | 10 | 154.2 | -2.4 | 4.03 | 0.95 |
| S5-22                          | Quartz | I | 8.4  | 10 | 168.3 | -1.7 | 2.90 | 0.92 |
| S5-23                          | Quartz | I | 5.9  | 30 | 178.5 | -3.5 | 5.71 | 0.93 |
| S5-24                          | Quartz | I | 6.7  | 30 | 187.6 | -0.5 | 0.88 | 0.89 |
| S5-25                          | Quartz | I | 7.2  | 15 | 199.5 | -0.7 | 1.22 | 0.88 |
| S5-26                          | Quartz | I | 7.2  | 10 | 156.8 | -2.1 | 3.55 | 0.94 |
| S5-27                          | Quartz | I | 6.4  | 10 | 187.6 | -2.2 | 3.71 | 0.91 |
| S5-28                          | Quartz | I | 6.2  | 20 | 178.4 | -0.5 | 0.88 | 0.90 |
| S5-29                          | Quartz | I | 6.5  | 15 | 168.5 | -0.6 | 1.05 | 0.91 |
| S5-30                          | Quartz | I | 5.5  | 10 | 153.9 | -0.5 | 0.88 | 0.93 |
| GZ-411-S6 (n = 29; this study) |        |   |      |    |       |      |      |      |
| S6-1                           | Quartz | I | 7.1  | 10 | 172.5 | -0.8 | 1.40 | 0.91 |
| S6-2                           | Quartz | I | 6.2  | 10 | 189.2 | -1.1 | 1.91 | 0.89 |
| S6-3                           | Quartz | I | 5.4  | 5  | 201.5 | -1.8 | 3.06 | 0.89 |
| S6-4                           | Quartz | I | 7.5  | 5  | 142.3 | -2.2 | 3.71 | 0.95 |
| S6-5                           | Quartz | I | 10.1 | 5  | 184.5 | -1.9 | 3.23 | 0.91 |
| S6-6                           | Quartz | I | 8.1  | 10 | 162.9 | -2.5 | 4.18 | 0.94 |
| S6-7                           | Quartz | I | 9.2  | 10 | 191.7 | -2.2 | 3.71 | 0.90 |
| S6-8                           | Quartz | I | 8.1  | 10 | 200.7 | -4.5 | 7.17 | 0.92 |
| S6-9                           | Quartz | I | 6.5  | 10 | 156.2 | -4.4 | 7.02 | 0.96 |
| S6-10                          | Quartz | I | 5.5  | 5  | 174.2 | -3.7 | 6.01 | 0.94 |
| S6-11                          | Quartz | I | 6.2  | 10 | 128.7 | -3.6 | 5.86 | 0.98 |
| S6-12                          | Quartz | I | 6.7  | 5  | 184.9 | -2.9 | 4.80 | 0.92 |
| S6-13                          | Quartz | I | 7.4  | 10 | 179.2 | -2.5 | 4.18 | 0.92 |
| S6-14                          | Quartz | I | 6.3  | 10 | 175.6 | -1.9 | 3.23 | 0.92 |
| S6-15                          | Quartz | I | 7.2  | 10 | 192.8 | -1.8 | 3.06 | 0.90 |

|       |        |   |      |    |       |      |      |      |
|-------|--------|---|------|----|-------|------|------|------|
| S6-16 | Quartz | I | 6.5  | 10 | 163.7 | -1.6 | 2.74 | 0.93 |
| S6-17 | Quartz | I | 9.3  | 15 | 188.1 | -2.3 | 3.87 | 0.91 |
| S6-18 | Quartz | I | 11.2 | 15 | 192.6 | -1.1 | 1.91 | 0.89 |
| S6-19 | Quartz | I | 8.2  | 15 | 172.6 | -1.2 | 2.07 | 0.91 |
| S6-20 | Quartz | I | 9.3  | 10 | 187.6 | -4.2 | 6.74 | 0.93 |
| S6-21 | Quartz | I | 10.7 | 10 | 175.2 | -0.8 | 1.40 | 0.91 |
| S6-22 | Quartz | I | 8.1  | 5  | 153.6 | -0.2 | 0.35 | 0.92 |
| S6-23 | Quartz | I | 7.6  | 5  | 157.4 | -0.4 | 0.70 | 0.92 |
| S6-24 | Quartz | I | 9.2  | 15 | 166.7 | -1.5 | 2.57 | 0.92 |
| S6-25 | Quartz | I | 5.8  | 15 | 179.2 | -2.7 | 4.49 | 0.92 |
| S6-26 | Quartz | I | 6.3  | 5  | 173.9 | -3.1 | 5.11 | 0.93 |
| S6-27 | Quartz | I | 6.7  | 5  | 168.2 | -0.9 | 1.57 | 0.92 |
| S6-28 | Quartz | I | 5.8  | 10 | 174.9 | -0.7 | 1.22 | 0.91 |
| S6-29 | Quartz | I | 5.5  | 5  | 166.5 | -1.3 | 2.24 | 0.92 |
